# Supplementary material
Source: MDPI journal article supplement (https://www.mdpi.com/2410-3896/8/2/38)
Supplement: s1 [file s1]

*Supporting Information for*

**Anodic Potential and Conversion Chemistry of Anhydrous Iron (II) Oxalate in  
Na-Ion Batteries**

Vasilii Gromov<sup>1</sup>, Atlas Noubir<sup>1</sup>, Fatemeh Keshavarz<sup>1\*</sup>, Ekaterina Laakso<sup>2</sup>, Bernardo  
Barbiellini<sup>1,3</sup>, Arun Bansil<sup>3</sup>

<sup>1</sup> Department of Physics, School of Engineering Science, LUT University, FI-53851  
Lappeenranta, Finland; gromovv.vasilii@gmail.com, atlasn789@gmail.com,  
bernardo.barbiellini@lut.fi

<sup>2</sup> Separation Science, School of Engineering Science, LUT University, FI-53851  
Lappeenranta, Finland; ekaterina.laaksoi@lut.fi

<sup>3</sup> Department of Physics, Northeastern University, Boston, MA 02115, USA;  
ar.bansil@northeastern.edu

\* Correspondence: fatemeh.keshavarz@lut.fi

**Table S1.** Properties of the non-periodic Na-free and Na-containing anhydrous ferrous oxalate (AFO) model at several spin states. <sup>a, b</sup>

| Spin state                                                                                       | NUE       | $E$ (Hartree)      | $G$ (Hartree)      | $S^2$        | $S^2A$       | IF | Structure                                                                             |
|--------------------------------------------------------------------------------------------------|-----------|--------------------|--------------------|--------------|--------------|----|---------------------------------------------------------------------------------------|
| <div>  </div> |           |                    |                    |              |              |    |                                                                                       |
| Na-free AFO                                                                                      |           |                    |                    |              |              |    |                                                                                       |
| 9tet                                                                                             | 8         | -4847.33889        | -4847.39530        | 20.08        | 20.00        | -  |    |
| 11tet                                                                                            | 10        | -4847.35057        | -4847.40958        | 30.06        | 30.00        | -  |    |
| <b>13tet</b>                                                                                     | <b>12</b> | <b>-4847.35780</b> | <b>-4847.41850</b> | <b>42.04</b> | <b>42.00</b> | -  |    |
| AFO + 1 Na <sup>0</sup>                                                                          |           |                    |                    |              |              |    |                                                                                       |
| 10tet                                                                                            | 9         | -5009.58392        | -5009.64623        | 24.94        | 24.75        | -  |    |
| 12tet                                                                                            | 11        | -5009.60039        | -5009.66378        | 35.92        | 35.75        | -  |  |
| <b>14tet</b>                                                                                     | <b>13</b> | <b>-5009.61206</b> | <b>-5009.67742</b> | <b>48.84</b> | <b>48.75</b> | -  |  |
| AFO + 2 Na <sup>0</sup>                                                                          |           |                    |                    |              |              |    |                                                                                       |
| 9tet                                                                                             | 8         | -5171.82100        | -5171.88738        | 21.66        | 20.44        | -  |  |
| 11tet                                                                                            | 10        | -5171.83343        | -5171.89850        | 30.62        | 30.04        | -  |  |
| <b>13tet</b>                                                                                     | <b>12</b> | <b>-5171.90942</b> | <b>-5171.97176</b> | <b>42.25</b> | <b>42.00</b> | -  |  |

<sup>a</sup> Number of unpaired electrons in the system (NUE), zero-point energy-corrected electronic energy ( $E$ ), Gibbs free energy at 298.15 K and 1 atm ( $G$ ), total spin before ( $S^2$ ) and after ( $S^2A$ ) annihilation, and imaginary frequencies (IF).

<sup>b</sup> The ground state is bolded.
